# Supplementary material
Source: publisher figshare collection journal article supplement (https://tandf.figshare.com/ndownloader/files/16782608)
Supplement: Supplementary file [file 16782608]

## Supplementary data

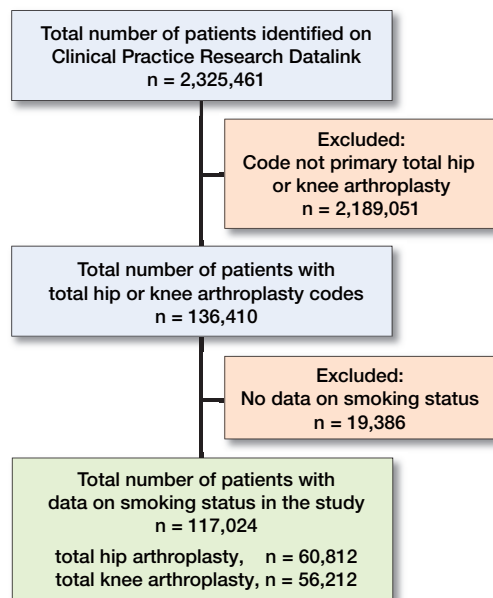

Appendix 1. Study selection criteria

Appendix 5. Estimation of the mean predicted preoperative (0 months) and postoperative (6 months) Oxford Hip and Knee Scores by smoking status with 95% confidence intervals (CI)

| Score             | Time of score          | Predicted score mean (CI) |
|-------------------|------------------------|---------------------------|
| Oxford Hip Score  | Smoker                 | Preoperative              |
|                   | 6 months postoperative | 14 (13–15)                |
|                   | Non-smoker             | Preoperative              |
|                   | 6 months postoperative | 35 (33–36)                |
| Oxford Knee Score | Smoker                 | Preoperative              |
|                   | 6 months postoperative | 16 (15–17)                |
|                   | Non-smoker             | Preoperative              |
|                   | 6 months postoperative | 37 (36–38)                |
| Oxford Knee Score | Smoker                 | Preoperative              |
|                   | 6 months postoperative | 16 (15–16)                |
|                   | Non-smoker             | Preoperative              |
|                   | 6 months postoperative | 37 (36–38)                |
| Oxford Knee Score | Smoker                 | Preoperative              |
|                   | 6 months postoperative | 16 (14–18)                |
|                   | Non-smoker             | Preoperative              |
|                   | 6 months postoperative | 30 (28–32)                |
| Oxford Knee Score | Smoker                 | Preoperative              |
|                   | 6 months postoperative | 18 (17–20)                |
|                   | Non-smoker             | Preoperative              |
|                   | 6 months postoperative | 34 (33–36)                |
| Oxford Knee Score | Smoker                 | Preoperative              |
|                   | 6 months postoperative | 18 (16–19)                |
|                   | Non-smoker             | Preoperative              |
|                   | 6 months postoperative | 33 (32–35)                |

Appendix 2. Outcomes following total hip arthroplasty. Values are frequency (%) unless otherwise stated

| Outcomes                                    | Smoker     | Non-smoker  | Ex-smoker   |
|---------------------------------------------|------------|-------------|-------------|
| Complications                               |            |             |             |
| Any ( $\geq 1$ complication)                | 826 (11)   | 3,260 (10)  | 2,161 (11)  |
| Cerebrovascular disease                     | 41 (0.5)   | 163 (0.5)   | 75 (0.4)    |
| Deep vein thrombosis                        | 120 (1.6)  | 571 (1.7)   | 290 (1.5)   |
| Ischemic heart disease                      | 67 (0.9)   | 290 (0.8)   | 206 (1.1)   |
| LRTI                                        | 353 (4.7)  | 892 (2.6)   | 817 (4.3)   |
| Myocardial infraction                       | 38 (0.5)   | 111 (0.3)   | 84 (0.4)    |
| Pulmonary embolism                          | 51 (0.7)   | 270 (0.8)   | 153 (0.8)   |
| Postop. wound infection                     | 141 (1.9)  | 593 (1.7)   | 388 (2.0)   |
| Urinary tract infection                     | 127 (1.7)  | 706 (2.1)   | 415 (2.2)   |
| Readmission to the hospital                 | 799 (11)   | 3,370 (9.9) | 2,264 (12)  |
| Medications                                 |            |             |             |
| Gabapentinoids                              | 469 (6.2)  | 1,435 (4.2) | 946 (5.0)   |
| NSAID                                       | 3,134 (42) | 12,040 (35) | 6,963 (37)  |
| Opioids                                     | 2,805 (37) | 7,858 (23)  | 5,985 (32)  |
| Weak opioids                                | 2,952 (39) | 11,301 (33) | 6,612 (35)  |
| Paracetamol                                 | 4,473 (59) | 18,677 (55) | 11,232 (59) |
| Mortality within                            |            |             |             |
| 1 year after THA                            | 189 (2.5)  | 528 (1.5)   | 379 (2.0)   |
| Postoperative Oxford Hip Score median (IQR) | 41 (32–45) | 43 (36–46)  | 42 (35–46)  |
| LRTI: Lower respiratory tract infection     |            |             |             |

Appendix 4. Outcomes following total knee arthroplasty. Values are frequency (%) unless otherwise stated

| Outcomes                                     | Smoker     | Non-smoker  | Ex-smoker   |
|----------------------------------------------|------------|-------------|-------------|
| Complications                                |            |             |             |
| Any ( $\geq 1$ complication)                 | 562 (11)   | 3,287 (10)  | 2,209 (12)  |
| Cerebrovascular disease                      | 20 (0.4)   | 110 (0.3)   | 82 (0.4)    |
| Deep vein thrombosis                         | 78 (1.5)   | 502 (1.6)   | 288 (1.5)   |
| Ischemic heart disease                       | 45 (0.9)   | 245 (0.8)   | 209 (1.1)   |
| LRTI                                         | 214 (4.2)  | 874 (2.7)   | 744 (3.9)   |
| Myocardial infraction                        | 19 (0.4)   | 87 (0.3)    | 71 (0.4)    |
| Pulmonary embolism                           | 33 (0.6)   | 265 (0.8)   | 165 (0.9)   |
| Postop. wound infection                      | 149 (2.9)  | 901 (2.8)   | 573 (3.0)   |
| Urinary tract infection                      | 75 (1.5)   | 669 (2.1)   | 309 (1.6)   |
| Readmission to the hospital                  | 671 (13)   | 4,150 (13)  | 2,816 (15)  |
| Medications                                  |            |             |             |
| Gabapentinoids                               | 377 (7.4)  | 1,652 (5.2) | 1,075 (5.6) |
| NSAID                                        | 2,633 (52) | 14,741 (46) | 8,870 (46)  |
| Opioids                                      | 2,342 (46) | 11,291 (35) | 7,799 (41)  |
| Weak opioids                                 | 2,348 (46) | 13,323 (42) | 8,037 (42)  |
| Paracetamol                                  |            |             |             |
| Mortality within                             |            |             |             |
| 1 year after TKA                             | 55 (1.1)   | 277 (0.9)   | 217 (1.1)   |
| Postoperative Oxford Knee Score median (IQR) | 35 (22–41) | 38 (30–43)  | 37 (30–43)  |
| LRTI: Lower respiratory tract infection      |            |             |             |

**Appendix 3. Univariable (crude) and multivariable (adjusted) regression models for each outcome of interest. The respective regression ratios are shown with 95% confidence intervals in brackets**

| Outcome                                                                                                            | THA              |                  | TKA              |                  |
|--------------------------------------------------------------------------------------------------------------------|------------------|------------------|------------------|------------------|
|                                                                                                                    | univariable      | multivariable    | univariable      | multivariable    |
| Cerebrovascular disease                                                                                            |                  |                  |                  |                  |
| Non-smoker                                                                                                         | 0.87 (0.50–1.53) | 0.56 (0.31–1.04) | 1.19 (0.54–2.60) | 0.84 (0.38–1.86) |
| Ex-smoker                                                                                                          | 0.75 (0.41–1.37) | 0.45 (0.23–0.85) | 1.73 (0.79–3.82) | 1.06 (0.49–2.31) |
| Deep vein thrombosis                                                                                               |                  |                  |                  |                  |
| Non-smoker                                                                                                         | 0.98 (0.73–1.32) | 0.95 (0.70–1.29) | 0.99 (0.70–1.40) | 0.91 (0.64–1.30) |
| Ex-smoker                                                                                                          | 0.92 (0.67–1.26) | 0.92 (0.66–1.27) | 0.90 (0.63–1.29) | 0.81 (0.56–1.17) |
| Ischemic heart disease                                                                                             |                  |                  |                  |                  |
| Non-smoker                                                                                                         | 0.75 (0.51–1.09) | 0.60 (0.41–0.88) | 0.76 (0.49–1.19) | 0.71 (0.46–1.12) |
| Ex-smoker                                                                                                          | 1.02 (0.69–1.51) | 0.80 (0.53–1.21) | 1.05 (0.67–1.64) | 0.88 (0.56–1.39) |
| Lower respiratory tract infection                                                                                  |                  |                  |                  |                  |
| Non-smoker                                                                                                         | 0.59 (0.49–0.71) | 0.53 (0.44–0.64) | 0.70 (0.56–0.87) | 0.66 (0.52–0.83) |
| Ex-smoker                                                                                                          | 0.94 (0.78–1.13) | 0.82 (0.67–0.99) | 0.98 (0.78–1.22) | 0.92 (0.73–1.16) |
| Myocardial infarction                                                                                              |                  |                  |                  |                  |
| Non-smoker                                                                                                         | 0.55 (0.32–0.96) | 0.36 (0.21–0.63) | 0.68 (0.34–1.34) | 0.62 (0.31–1.25) |
| Ex-smoker                                                                                                          | 0.72 (0.40–1.28) | 0.45 (0.25–0.81) | 0.98 (0.49–1.95) | 0.71 (0.35–1.44) |
| Pulmonary embolism                                                                                                 |                  |                  |                  |                  |
| Non-smoker                                                                                                         | 0.92 (0.61–1.41) | 0.85 (0.56–1.31) | 1.59 (0.86–2.95) | 1.31 (0.70–2.44) |
| Ex-smoker                                                                                                          | 0.88 (0.56–1.37) | 0.80 (0.51–1.26) | 1.45 (0.77–2.74) | 1.24 (0.66–2.34) |
| Wound infection                                                                                                    |                  |                  |                  |                  |
| Non-smoker                                                                                                         | 1.07 (0.81–1.43) | 1.06 (0.80–1.42) | 0.96 (0.75–1.24) | 0.98 (0.75–1.27) |
| Ex-smoker                                                                                                          | 1.22 (0.91–1.64) | 1.19 (0.88–1.60) | 1.03 (0.80–1.34) | 1.10 (0.85–1.44) |
| Urinary tract infection                                                                                            |                  |                  |                  |                  |
| Non-smoker                                                                                                         | 1.15 (0.87–1.51) | 0.87 (0.66–1.16) | 1.50 (1.07–2.11) | 1.10 (0.78–1.55) |
| Ex-smoker                                                                                                          | 1.28 (0.96–1.70) | 1.09 (0.82–1.47) | 1.11 (0.78–1.59) | 0.96 (0.67–1.38) |
| Readmission                                                                                                        |                  |                  |                  |                  |
| Non-smoker                                                                                                         | 0.85 (0.79–0.92) | 0.83 (0.76–0.90) | 0.96 (0.88–1.04) | 0.97 (0.89–1.06) |
| Ex-smoker                                                                                                          | 1.03 (0.94–1.12) | 0.96 (0.88–1.05) | 1.08 (0.99–1.18) | 1.07 (0.98–1.16) |
| Gabapentinoids                                                                                                     |                  |                  |                  |                  |
| Non-smoker                                                                                                         | 0.68 (0.58–0.80) | 0.73 (0.62–0.86) | 0.70 (0.60–0.82) | 0.72 (0.61–0.84) |
| Ex-smoker                                                                                                          | 0.80 (0.68–0.95) | 0.83 (0.70–0.99) | 0.80 (0.68–0.94) | 0.86 (0.72–1.01) |
| NSAIDs                                                                                                             |                  |                  |                  |                  |
| Non-smoker                                                                                                         | 0.88 (0.83–0.92) | 0.94 (0.89–0.99) | 0.90 (0.86–0.94) | 0.97 (0.93–1.02) |
| Ex-smoker                                                                                                          | 0.89 (0.84–0.94) | 0.97 (0.92–1.02) | 0.88 (0.84–0.92) | 0.97 (0.92–1.01) |
| Opioids                                                                                                            |                  |                  |                  |                  |
| Non-smoker                                                                                                         | 0.61 (0.57–0.64) | 0.65 (0.61–0.69) | 0.76 (0.72–0.80) | 0.82 (0.78–0.86) |
| Ex-smoker                                                                                                          | 0.88 (0.82–0.93) | 0.90 (0.84–0.95) | 0.88 (0.84–0.93) | 0.96 (0.91–1.01) |
| Weak opioids                                                                                                       |                  |                  |                  |                  |
| Non-smoker                                                                                                         | 0.85 (0.81–0.90) | 0.82 (0.78–0.87) | 0.88 (0.84–0.93) | 0.87 (0.83–0.92) |
| Ex-smoker                                                                                                          | 0.89 (0.85–0.95) | 0.91 (0.86–0.97) | 0.89 (0.85–0.94) | 0.93 (0.88–0.98) |
| Paracetamol                                                                                                        |                  |                  |                  |                  |
| Non-smoker                                                                                                         | 0.94 (0.91–0.98) | 0.87 (0.84–0.90) | 0.98 (0.95–1.01) | 0.94 (0.91–0.97) |
| Ex-smoker                                                                                                          | 1.03 (0.99–1.07) | 0.96 (0.93–1.00) | 0.99 (0.96–1.03) | 0.98 (0.95–1.01) |
| Mortality                                                                                                          |                  |                  |                  |                  |
| Non-smoker                                                                                                         | 0.51 (0.40–0.66) | 0.37 (0.29–0.49) | 0.73 (0.48–1.11) | 0.52 (0.34–0.81) |
| Ex-smoker                                                                                                          | 0.77 (0.60–1.00) | 0.53 (0.40–0.70) | 1.00 (0.65–1.53) | 0.71 (0.46–1.10) |
| Revision surgery                                                                                                   |                  |                  |                  |                  |
| Non-smoker                                                                                                         | 0.95 (0.74–1.21) | 1.13 (0.88–1.47) | 0.86 (0.66–1.13) | 1.19 (0.90–1.58) |
| Ex-smoker                                                                                                          | 0.96 (0.73–1.25) | 1.10 (0.84–1.46) | 0.78 (0.58–1.04) | 1.06 (0.78–1.42) |
| THA = total hip arthroplasty; TKA = total knee arthroplasty.<br>Smoking group is the reference group in all cases. |                  |                  |                  |                  |
